# Supplementary material for: Hollow TiO2 microspheres: template-free synthesis, remarkable structure stability, and improved photoelectric performance
Source: Royal Society of Chemistry journal article supplement (doi:10.1039/c5nj02380g), 2016-01-01
Supplement: c5nj02380g1.pdf [file c5nj02380g1.pdf]

## Supporting Information

### **Hollow TiO<sub>2</sub> Microspheres: Template-Free Synthesis, Remarkable Structure Stability, and Improved Photoelectric Performance**

Xinxin Fu, Chenyao Fan, Lin Shi, Siqi Yu and Zhiyu Wang<sup>\*a</sup>

<sup>a</sup> State Key Laboratory of Silicon Materials, Department of Materials Science and Engineering, Zhejiang University, Hangzhou, China

E-mail: wangzhiyu@zju.edu.cn

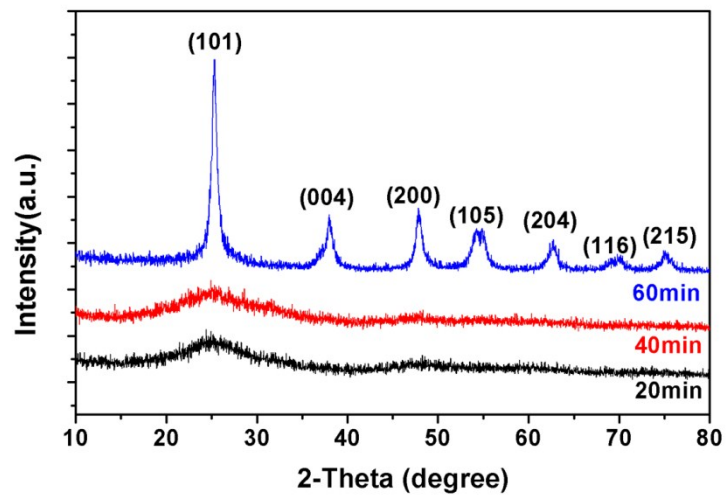

**Figure S1** The XRD patterns of products obtained at different reaction interval during the formation of HTS.

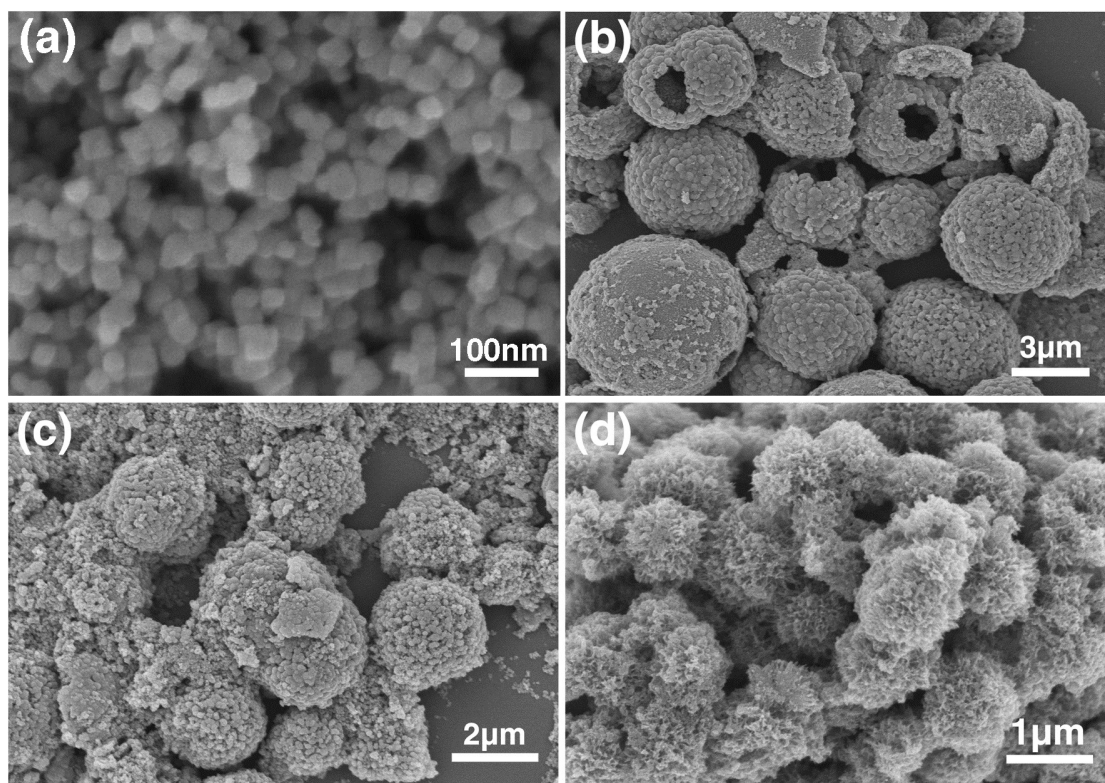

**Figure S2** SEM images of products obtained under different reaction solvents. (a) water, (b) isopropanol, (c) ethylene glycol and (d) glycerol

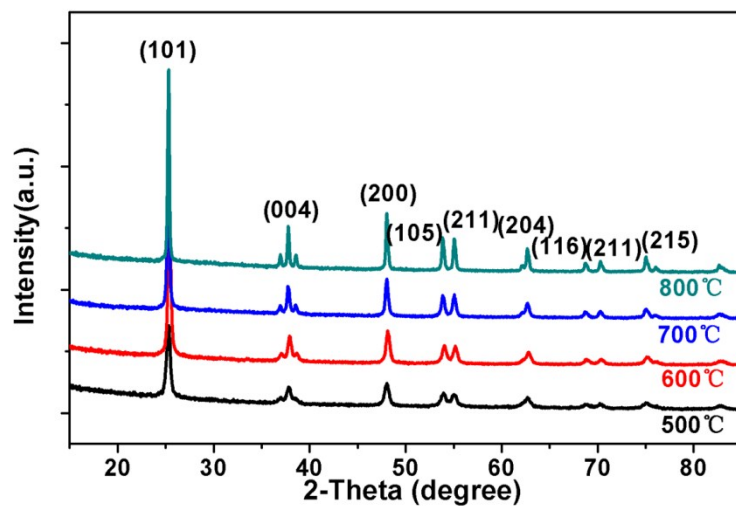

**Figure S3** XRD patterns of HTS after different calcination temperatures.

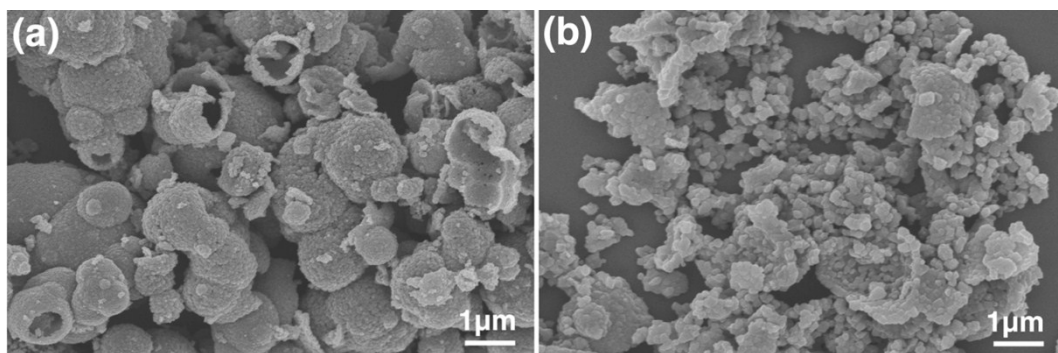

**Figure S4** The comparison SEM images before and after calcination of  $\text{TiO}_2$  hollow spheres obtained under the condition of without HCl.

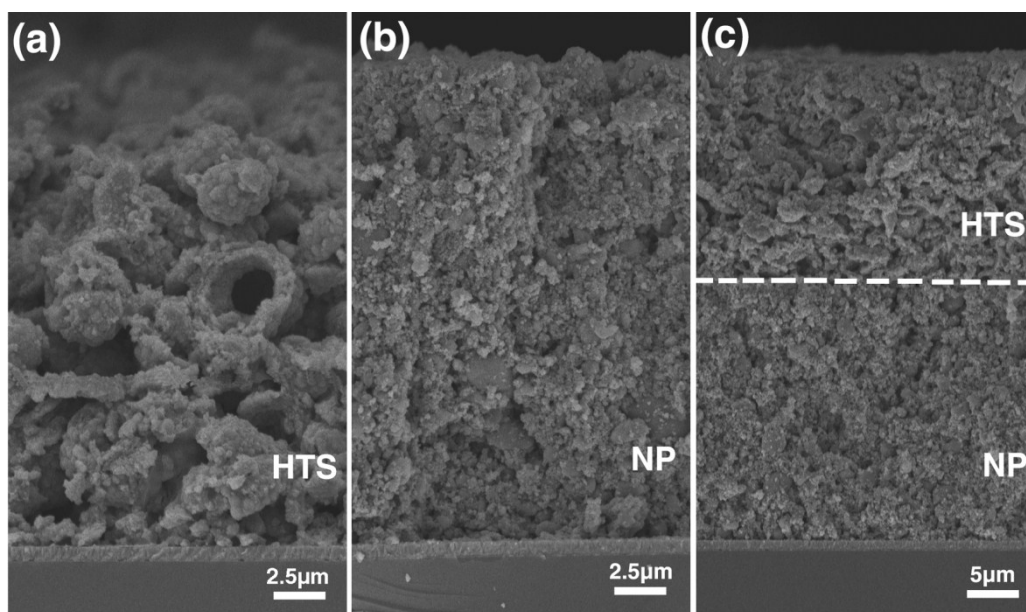

**Figure S5** Cross-section SEM images of the three  $\text{TiO}_2$  films: (a) THS-film, (b) NP-film and the HTS+NP bilayer film.

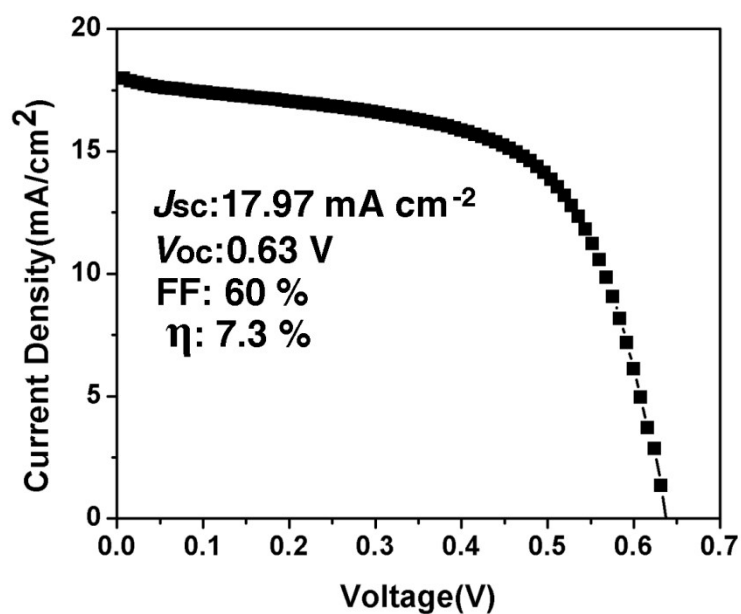

**Figure S6** Photocurrent density-voltage curve of a DSSCs based on the bilayer structured photo-anode by introducing HTS as the light scattering layer over the NP film.

**Table S1** Photovoltaic performance of DSSCs fabricated from NP and HTS TiO<sub>2</sub> photo-anode (the active area for all the cells is about 0.16 cm<sup>2</sup>).

| Cells | $J_{sc}/\text{mA cm}^{-2}$ | $V_{oc}/\text{V}$ | FF | $\eta$ (%) | Dye absorption/mol cm <sup>-2</sup> |
|-------|----------------------------|-------------------|----|------------|-------------------------------------|
| NP    | 12.8                       | 0.64              | 60 | 5.0        | $1.9 \times 10^{-7}$                |
| HTHS  | 15.3                       | 0.72              | 58 | 6.3        | $2.3 \times 10^{-7}$                |
